# Supplementary material
Source: PubMed Central journal article supplement (PMC5507616)
Supplement: NIHMS876042-supplement-S_Table_1.pdf [file NIHMS876042-supplement-S_Table_1.pdf]

**TABLE S1.** Primer sequences for real-time RT-PCR

| Gene                                | GenBank accession no. | Forward                 | Reverse                   |
|-------------------------------------|-----------------------|-------------------------|---------------------------|
| <i>AhR</i>                          | NM_013464             | ACCAGAACTGTGAGGGTTGG    | CTCCCATCGTATAGGGAGCA      |
| <i>β-actin</i>                      | V01217                | TGACCGAGCGTGGCTACAG     | GGGCAACATAGCACAGCTTCT     |
| <i>Bmal1</i>                        | NM_007489             | ACGACATAGGACACCTCGCAGA  | CGGGTTCATGAAACTGAACCATC   |
| <i>CAR</i>                          | NM_009803             | CTCAAGGAAAGCAGGGTCAG    | AGTTCCTCGGCCCATATTCT      |
| <i>Cry1</i>                         | NM_007771             | GGATCCACCATTTAGCCAGACAC | CATTTATGCTCCAATCTGCATCAAG |
| <i>Cyp1a1</i>                       | NM_009992             | TGCCCTTCATTGGTCACATG    | CACGTCCCCATACTGCTGACT     |
| <i>Cyp1a2</i>                       | NM_009993             | GACATGGCCTAACGTGCAG     | GGTCAGAAAGCCGTGGTTG       |
| <i>Cyp2a4</i>                       | NM_00997              | GTCCCCTTGATCCTGGGCTGC   | TCCCCCTTCTCTGGCTACCTTTGA  |
| <i>Cyp2b10</i>                      | AF128849              | AAGGAGAAGTCCAACCAGCA    | CTCTGCAACATGGGGGTACT      |
| <i>Cyp2e1</i>                       | NM_021282             | TCCCTAAGTATCCTCCGTGA    | GTAATCGAAGCGTTTGTGTA      |
| <i>Cyp3a11</i>                      | NM_007818             | ACAAACAAGCAGGGATGGAC    | CCCATATCGGTAGAGGAGCA      |
| <i>Cyp3a25</i>                      | NM_001105160          | AGTACTGGCCAGAGCCTCAA    | TCGTTCTCCTTGCTGAACCT      |
| <i>Cyp4a10</i>                      | NM_010011             | CACACCCTGATCACCAACAG    | TCCTTGATGCACATTGTGGT      |
| <i>Cyp4a14</i>                      | NM_007822             | CTGGGTGATGGAACCTCTGT    | CATCTGGGAAGGTGACAGGT      |
| <i>Cyp7b1</i>                       | NM_007825             | GCCTTTTGGACTCGGAACAAG   | AATCGGGGTGCTGAATACCTAA    |
| <i>Cyp7a1</i>                       | NM_007824             | GGCTAGCATAGCCAACCTGC    | TGCCCTTCTGAAGCTCATCT      |
| <i>Cyp27a1</i>                      | NM_024264             | GAGAGTGAATCAGGGGACCA    | TCAGGAATGGAGGGTTTCAG      |
| <i>Dbp</i>                          | NM_016974             | CTGGCCCGAGTCTTTTTGC     | CCAGGTCCACGTATTCCACG      |
| <i>G3PDH</i>                        | M32599                | AACTTTGGCATTGTGGAAGG    | GGATGCAGGGATGATGTTCT      |
| <i>Per1</i>                         | NM-011065             | ACCAGGTCATTAAGTGTGTGC   | CTCTCCCGGTCTTGCTTCA       |
| <i>Per2</i>                         | NM_011066             | CCTACAGCATGGAGCAGGTTGA  | TTCCCAGAAACCAGGGACACA     |
| <i>PPARα</i>                        | NM_011144             | GTCCCTCAGTGCTTCCAGAGG   | GGTCACCTACGAGTGGCATT      |
| <i>PXR</i>                          | AF031814              | CCCATCAACGTAGAGGAGGA    | TCTGAAAAACCCCTTGCATC      |
| <i>FXR</i>                          | AY094586              | CTGACCCTGCCATCCAAGT     | TCAGAAGCCGATGTTCTCT       |
| <i>Rev-erba</i><br>( <i>Nr1d1</i> ) | NM_145434             | GTGAAGACATGACGACCCTGGA  | TGCCATTGGAGCTGTCACTGTAG   |
